# Supplementary material
Source: PubMed Central journal article supplement (PMC9074405)
Supplement: bloodBLD2022016087-suppl1.pdf [file bloodBLD2022016087-suppl1.pdf]

1 **SUPPLEMENTAL APPENDIX**

2 **Supplement to:**

3 ***Neutralization of SARS-CoV-2 Omicron and variants of concern following second and***  
4 ***third vaccinations in patients with myelodysplastic syndromes and acute myeloid***  
5 ***leukemia*** by Lorenza Bellusci, PhD; Gabrielle Grubbs, BS; Pragma Srivastava, PhD, Michael  
6 J. Nemeth, PhD; Elizabeth A. Griffiths, MD; Hana Golding, PhD; Surender Khurana, PhD.

7

8

9

10

**TABLE OF CONTENTS**

11

**CONTENTS**

12

**1. Materials and Methods**

13

Study background, patient characteristics, vaccines

14

Neutralization assay

15

ELISA

16

Quantification and statistical analysis

17

**2. Supplementary Table 1.** Patient's demographics, clinical characteristics, and vaccination  
18 type

19

**3. Supplementary Table 2.** Demographics and neutralization titers of post-vaccination  
20 serum used in this study

21

**4. Acknowledgments**

22

**5. Supplementary References**

23

24

25

26

27 **MATERIALS AND METHODS**

28 **Study background, patient characteristics, vaccines**

29 Patients with myeloid malignancy, including MDS and AML, are routinely vaccinated  
30 on the presumption that the potential benefits outweigh any risk, although the response to  
31 such vaccinations are not well documented. Moreover, such patients were prioritized for  
32 vaccination against the emergent pandemic viral infection caused by SARS-CoV-2. Despite  
33 these efforts, there remains a fundamental gap in clinical knowledge about whether patients  
34 with myeloid malignancy respond to routine vaccination or if the therapies we use for these  
35 diseases impact these antibody responses.

36 To address this gap in knowledge, we designed a clinical study to assess the  
37 immunologic response following administration of the yearly influenza vaccination in patients  
38 with myeloid malignancies who are receiving different types of chemotherapy compared to  
39 healthy age-matched controls. The study was registered with clinicaltrials.gov  
40 (#NCT04484532) and is conducted in accordance with the Declaration of Helsinki, approved  
41 by the Roswell Park Cancer Institute Review Board. All patients provided written informed  
42 consent. Consent on this study included agreement for the use of remnant material for  
43 additional immunological assays at the time of study enrollment. Eligible patients carried a  
44 diagnosis of myeloid malignancy and were receiving standard of care treatment for their  
45 disease, including watchful waiting, growth factor support, or hypomethylating agents  
46 (including azacitidine or decitabine) either alone or in combination with venetoclax. Additional  
47 enrollment criteria included willingness to undergo seasonal influenza vaccination, and  
48 estimated survival of at least 8 weeks following study enrollment. Patients enrolled to this  
49 study received seasonal influenza vaccination for the year of enrollment and underwent

50 peripheral blood sampling prior to the vaccine and at serial time points following the influenza  
51 vaccination (baseline, 0-3m after vaccination, 3-6 months after vaccination).

52 Given the emergence of pandemic viral illness with SARS-CoV-2, the etiological agent of  
53 COVID-19, we assessed whether these patients with myeloid disorders demonstrated  
54 responses to COVID-19 vaccines received as standard of care. Medical records for these  
55 patients were reviewed and the types of vaccine, dates of vaccine administration and clinical  
56 characteristics of the patients were extracted. Table 1 lists the summary of patient  
57 characteristics for this cohort. Supplementary Table S1 lists the extended clinical  
58 characteristics, treatments summary, vaccine/booster types, and the time point of sampling  
59 relative to the most recent COVID-19 vaccination given.

60 Post-SARS-Cov-2 mRNA vaccination serum samples after the second vaccination and  
61 third vaccination were also obtained from SARS-CoV-2 naïve 16 healthy adult healthcare  
62 workers who work at research institution and are not exposed to COVID-19 patients as a  
63 comparative control group.

64

## 65 **Neutralization assay**

66 Sera were evaluated in a qualified SARS-CoV-2 pseudovirion neutralization assay  
67 (PsVNA) using SARS-CoV-2 WA-1 strain and the five variants of concern (VOCs): Alpha  
68 variant (B.1.1.7; with spike mutations H69-V70del, Y144del, N501Y, A570D, D614G, P681H,  
69 T716I, S982A, and D1118H), Beta variant (B.1.351; with spike mutations L18F, D80A,  
70 D215G, L242-244del, R246I, K417N, E484K, N501Y, D614G, and A701V), Gamma variant  
71 (P.1; with spike mutations L18F, T20N, P26S, D138Y, R190S, K417T, E484K, N501Y,  
72 H655Y, T1027I, D614G, V1176F), Delta variant (B.1.617.2; with spike mutations

73 T19R,G142D,E156del,F157del,R158G,L452R,T478K,D614G,P681R,D950N) and Omicron variant  
74 (B.1.1.529; with spike mutations A67V, H69-70del, T95I, G142D, V143-145del, Y145D, N211del,  
75 L212I, ins214EPE, G339D, S371L, S373P, S375F, K417N, N440K, G446S, S477N, T478K, E484A,  
76 Q493R, G496S, Q498R, N501Y, Y505H, T547K, D614G, H655Y, N679K, P681H, N764K, D796Y,  
77 N856K, Q954H, N969K, L981F). SARS-CoV-2 neutralizing activity measured by PsVNA  
78 correlates with PRNT (plaque reduction neutralization test with authentic SARS-CoV-2 virus)  
79 in previous studies <sup>1-3</sup>

80 Pseudovirions were produced as previously described<sup>3</sup>. Briefly, human codon-optimized  
81 cDNA encoding SARS-CoV-2 spike glycoprotein of the WA-1 and variant strains were  
82 synthesized by GenScript and cloned into eukaryotic cell expression vector pcDNA 3.1  
83 between the *Bam*HI and *Xho*I sites. The plasmid vector encoding spike for Omicron variant  
84 was a gift from Vaccine Research Center, NIAID, NIH. Pseudovirions were produced by co-  
85 transfection Lenti-X 293T cells with psPAX2(gag/pol), pTrip-luc lentiviral vector and pcDNA  
86 3.1 SARS-CoV-2-spike-deltaC19, using Lipofectamine 3000. The supernatants were  
87 harvested at 48h post transfection and filtered through 0.45µm membranes and titrated using  
88 293T-ACE2-TMPRSS2 cells (HEK 293T cells that express ACE2 and TMPRSS2 proteins)<sup>3</sup>.

89 Neutralization assays were performed as previously described <sup>1 4,5</sup>. For the neutralization  
90 assay, 50 µL of SARS-CoV-2 S pseudovirions (counting ~200,000 relative light units) were  
91 pre-incubated with an equal volume of medium containing serial dilutions (20-, 60-, 180-, 540-  
92 , 1,620-, 4,860-, 14,580- and 43,740-fold dilution at the final concentration) of heat-inactivated  
93 serum at room temperature for 1h. Then 50 µL of virus-antibody mixtures were added to 293T-  
94 ACE2-TMPRSS2 cells (10<sup>4</sup> cells/50 µL) <sup>3</sup> in a 96-well plate. The input virus with all SARS-  
95 CoV-2 strains used in the current study were the same (2 x 10<sup>5</sup> relative light units/50 µL/well).

96 After a 3 h incubation, fresh medium was added to the wells. Cells were lysed 24 h later, and  
97 luciferase activity was measured using One-Glo luciferase assay system (Promega, Cat#  
98 E6130). The assay of each serum was performed in duplicate, and the 50% neutralization  
99 titer was calculated using Prism 9 (GraphPad Software). Controls included cells only, virus  
100 without any antibody and positive sera. The limit of detection for the neutralization assay is  
101 1:20. Two independent biological replicate experiments were performed for each sample and  
102 variation in PsVNA50 titers was <9% between replicates.

103

#### 104 **Seroreactivity of post-vaccination samples to SARS-CoV-2 receptor binding domain by** 105 **ELISA**

106 96 well Immulon plates were coated with 50 ng/100  $\mu$ L of recombinant spike-RBD either  
107 from vaccine-homologous WA1/2020 or the Omicron variant in PBS overnight at 4°C. Starting  
108 at a 1:100 dilution, serum samples were serially diluted 5-fold and applied to the coated well  
109 for 1 hr at ambient temperature. Serum samples were assayed in duplicate. After three  
110 washes with PBS/0.05% Tween 20, bound human IgG antibodies were detected with 1:5000  
111 dilution of HRP-conjugated anti-human IgG Fc-specific antibody (Jackson Immuno  
112 Research). After 1 hr, plates were washed PBST followed by PBS, and o-Phenylenediamine  
113 dihydrochloride (OPD) was added for 10 min. Absorbance was measured at 492 nm. End titer  
114 was determined as 2-fold above the average of the absorbance values of the binding of serum  
115 samples to blank control wells. The end-point titer is reported as the serum dilution that was  
116 above this cutoff and was calculated using Prism 9 (GraphPad Software).

117

118 **Quantification and statistical analysis**

119 Descriptive statistics were performed to determine the geometric mean titer values and  
120 were calculated using GraphPad. All experimental data to compare differences among groups  
121 were analyzed using lme4 and emmeans packages in R (RStudio version 1.1.463).

122 The demographic characteristics of these study participants are shown in Supplementary  
123 Table 1. Since age and sex can be biologically plausible confounders, data were analyzed for  
124 statistical significance between groups to control for age and sex as covariates (predictor  
125 variables) using a multivariate linear regression model. To ensure robustness of the results,  
126 absolute measurements were log<sub>2</sub>-transformed before performing the analysis. For  
127 comparisons between the vaccine groups (factor variable), pairwise comparisons were  
128 extracted using ‘emmeans’ and Tukey-adjusted p values were used for denoting significance  
129 to reduce Type 1 error due to multiple testing. The tests were two-sided tests. The differences  
130 were considered statistically significant with a 95% confidence interval when the p value was  
131 less than 0.05. (\* ≤0.05, \*\* ≤0.01, \*\*\* ≤ 0.001, \*\*\*\* ≤0.0001).

132

133

134 **Acknowledgments**

135 We would like to thank Basil Golding and Keith Peden at FDA for review of the manuscript.

136 We thank Carol Weiss (FDA) and NIH Vaccine Research Center for providing plasmid clones  
137 expressing SARS-CoV-2 spike variants.

138

139 **Supplementary References**

- 140 1. Tang J, Lee Y, Ravichandran S, et al. Epitope diversity of SARS-CoV-2 hyperimmune intravenous human  
141 immunoglobulins and neutralization of variants of concern. *iScience*. 2021;24(9):103006.
- 142 2. Ravichandran S, Coyle EM, Klenow L, et al. Antibody signature induced by SARS-CoV-2 spike protein  
143 immunogens in rabbits. *Sci Transl Med*. 2020;12(550):eabc3539.
- 144 3. Neerukonda SN, Vassell R, Herrup R, et al. Establishment of a well-characterized SARS-CoV-2 lentiviral  
145 pseudovirus neutralization assay using 293T cells with stable expression of ACE2 and TMPRSS2. *PLoS One*.  
146 2021;16(3):e0248348.
- 147 4. Ravichandran S, Tang J, Grubbs G, et al. SARS-CoV-2 immune repertoire in MIS-C and pediatric COVID-19.  
148 *Nat Immunol*. 2021.
- 149 5. Ravichandran S, Grubbs G, Tang J, et al. Systemic and mucosal immune profiling in asymptomatic and  
150 symptomatic SARS-CoV-2-infected individuals reveal unlinked immune signatures. *Sci Adv*.  
151 2021;7(42):eabi6533.

152

Supplementary Table S1: Participant's demographics, clinical characteristics, and vaccination type

| Patient ID                                       | Age | Sex    | Diagnosis                        | Karyotype                                    | IPSS-R/ELN/DIPSS             | Treatment                         | Vaccine Type | Days from Last Vaccination |
|--------------------------------------------------|-----|--------|----------------------------------|----------------------------------------------|------------------------------|-----------------------------------|--------------|----------------------------|
| <b>Post-2nd vaccine dose in AML/MDS patients</b> |     |        |                                  |                                              |                              |                                   |              |                            |
| P-1                                              | 81  | Male   | MDS                              | Complex (del(5q), del(7), +21)               | 8 (Very High)                | Azacitidine 9 cycles              | Moderna      | 250                        |
| P-2                                              | 45  | Male   | CMML                             | Normal                                       | 1.5 (Very Low)               | Decitabine 10 cycles              | Moderna      | 162                        |
| P-3                                              | 77  | Female | AML                              | Normal                                       | Intermediate                 | Azacitidine/Venetoclax 7 cycles   | Moderna      | 219                        |
| P-4                                              | 65  | Male   | MDS                              | Normal                                       | 5.5 (High)                   | Azacitidine 24 cycles             | Pfizer       | 186                        |
| P-5                                              | 76  | Female | AML-MRC                          | Normal                                       | Adverse (ASXL1)              | Decitabine/Venetoclax +6 cycles   | Moderna      | 228                        |
| P-6                                              | 74  | Male   | AML-MRC                          | Normal                                       | Favorable (NPM1)             | Azacitidine/Venetoclax +6 cycles  | Moderna      | 153                        |
| P-7                                              | 82  | Female | MDS                              | Normal                                       | 1.5 (Very Low)               | Observation                       | Moderna      | 184                        |
| P-8                                              | 52  | Male   | MDS                              | Normal                                       | 2.5 (Low)                    | Observation                       | Pfizer       | 179                        |
| P-9                                              | 74  | Male   | MDS                              | Normal                                       | 2 (Low)                      | Darboepoetin                      | Moderna      | 228                        |
| P-10                                             | 73  | Male   | MDS                              | 46,XY,del(12)(q15q24.1)                      | 3 (Low)                      | Decitabine 10 cycles              | Pfizer       | 194                        |
| P-11                                             | 66  | Male   | AML-MRC                          | complex                                      | Adverse                      | Decitabine/Venetoclax 4 cycles    | Pfizer       | 198                        |
| P-12                                             | 74  | Male   | MDS                              | 46,XY,del(3)(q12q25),del(7)(q22q38)          | 7.5 (Very High)              | Azacitidine 5 cycles              | Pfizer       | 186                        |
| P-13                                             | 70  | Male   | AML-MRC                          | Normal                                       | Adverse (FLT3+TD)            | Decitabine/Venetoclax 2 Cycles    | Janssen      | 195                        |
| P-14                                             | 65  | Male   | MDS                              | 46,XY [20]                                   | 3 (Low)                      | Decitabine/Cedazuridine 20 cycles | Pfizer       | 56                         |
| P-15                                             | 79  | Female | JAK2 <sup>617T*</sup> Post ET-MF |                                              | DIPSS-3                      | Hydroxyurea                       | Pfizer       | 189                        |
| P-16                                             | 52  | Male   | JAK2 <sup>617T*</sup> PV         | 46,XY [20]                                   |                              | Hydroxyurea                       | Pfizer       | 79                         |
| P-17                                             | 63  | Male   | AML-MRC                          | 46,XY [20]                                   | Adverse (AML-MRC/Secondary)  | Post-Alo BMT                      | Pfizer       | 228                        |
| P-18*                                            | 73  | Female | MDS                              | 46,XX,der(7)t(add7)(p12)add7(g11.2)(q1.2)[4] | 3 (Intermediate)             | Observation                       | Pfizer       | 146                        |
| P-19                                             | 82  | Female | MDS                              | 46,XX [17]                                   | 3.5 (Intermediate)           | Cyclosporine/Eltrombopag          | Pfizer       | 42                         |
| P-20                                             | 39  | Female | JAK2 <sup>617T*</sup> PV         | 46,XX [20]                                   |                              | Peginterferon                     | Pfizer       | 58                         |
| P-21                                             | 59  | Male   | JAK2 <sup>617T*</sup> Post ET-MF |                                              |                              | Ruxofitinb                        | Moderna      | 15                         |
| P-22                                             | 77  | Male   | AML                              | 47,XY +8, del(7q)                            | Adverse                      | Azacitidine/Venetoclax 9 cycles   | Moderna      | 65                         |
| P-23                                             | 76  | Male   | MDS                              | Complex                                      | 7.5 (Very High)              | Decitabine/Venetoclax 8 cycles    | Pfizer       | 31                         |
| P-24                                             | 56  | Female | JAK2 <sup>617T*</sup> ET         | 46,XX [20]                                   |                              | Anagrelide                        | Pfizer       | 31                         |
| P-25                                             | 28  | Male   | AML                              | 46,XY [20]                                   | Adverse                      | Post-Alo BMT                      | Pfizer       | 201                        |
| P-26                                             | 63  | Female | JAK2 <sup>617T*</sup> Primary MF |                                              | DIPSS-0                      | Observation                       | Pfizer       | 30                         |
| P-27                                             | 70  | Male   | MDS                              | 46,XY [20]                                   | 3.5 (Intermediate)           | Decitabine/Cedazuridine 38 cycles | Moderna      | 68                         |
| P-28                                             | 76  | Female | MDS                              | 46,XX,del(13)(q12q21)[6],46,XX[14]           | 2 (Low)                      | Observation                       | Moderna      | 64                         |
| P-29                                             | 55  | Female | JAK2 <sup>617T*</sup> PV         |                                              |                              | Phlebotomy                        | Pfizer       | 141                        |
| P-30*                                            | 70  | Female | MDS                              | 46,XX [20]                                   | 1.5 (Low)                    | Observation                       | Moderna      | 70                         |
| P-31                                             | 89  | Female | MDS                              | 48,XX,del(5q)                                | 2 (Low)                      | Darboepoetin                      | Moderna      | 155                        |
| P-32                                             | 69  | Female | MDS                              | 46,XX[20]                                    | 1 (Low)                      | Darboepoetin/G-CSF                | Moderna      | 86                         |
| P-33                                             | 71  | Female | JAK2 <sup>617T*</sup> Primary MF | 47,XX, +8 [20]                               | DIPSS-4                      | Ruxofitinb                        | Moderna      | 73                         |
| P-34                                             | 81  | Male   | JAK2 <sup>617T*</sup> PV         |                                              |                              | Hydroxyurea                       | Moderna      | 101                        |
| P-35                                             | 64  | Male   | MDS                              | 46,XY [25]                                   | 3 (Intermediate)             | Observation                       | Pfizer       | 134                        |
| P-36                                             | 69  | Female | JAK2 <sup>617T*</sup> PV         | 46,XX [20]                                   |                              | Ruxofitinb/Hydroxyurea            | Moderna      | 148                        |
| P-37                                             | 83  | Female | AML-MRC                          | 46,XX,del(20)(q11.2)q13.3[2]                 | Adverse (AML-MRC/Secondary)  | Azacitidine 14 cycles             | Moderna      | 286                        |
| P-38                                             | 66  | Male   | JAK2 <sup>617T*</sup> PV         |                                              |                              | Ruxofitinb                        | Moderna      | 272                        |
| <b>Post-3rd vaccine dose in AML/MDS patients</b> |     |        |                                  |                                              |                              |                                   |              |                            |
| P-48                                             | 78  | Male   | AML                              | Trisomy 8                                    | Intermediate (FLT3 ITD/NPM1) | Azacitidine/Gilteritinb 25 cycles | Moderna      | 24                         |
| P-49                                             | 82  | Male   | AML                              | Trisomy 8                                    | Intermediate                 | Azacitidine/Venetoclax +6 cycles  | Pfizer       | 27                         |
| P-50                                             | 77  | Male   | AML MRC                          | Del (7q), +6,                                | Adverse (ASXL1/RUNX1)        | Azacitidine/Venetoclax 7 cycles   | Moderna      | 27                         |
| P-51                                             | 79  | Male   | MDS                              | Normal                                       | 1.5 (Very Low)               | Observation                       | Moderna      | 22                         |
| P-52                                             | 64  | Male   | MDS                              | Normal                                       | 1 (Very Low)                 | Observation                       | Pfizer       | 39                         |
| P-53*                                            | 65  | Male   | MDS                              | 46,XY,del(7)(q22q36)                         | 8 (Very High)                | Azacitidine/Glasdegib 31 cycles   | Pfizer       | 53                         |
| P-54                                             | 70  | Female | MDS                              | Normal                                       | 1.5 (Very Low)               | Observation                       | Moderna      | 40                         |
| P-55                                             | 76  | Female | AML-MRC                          | Normal                                       | Intermediate                 | Azacitidine/Venetoclax 5 cycles   | Unknown      | Unknown                    |
| P-56                                             | 63  | Female | MDS                              | complex +3                                   | 6.5 (Very High)              | Azacitidine 6 cycles              | Moderna      | 24                         |
| P-57                                             | 76  | Female | MDS                              | 46,XY Del13q                                 | 2 (Low)                      | Observation                       | Moderna      | 34                         |
| P-30R†                                           | 70  | Female | MDS                              | 46,XX [20]                                   | 1.5 (Low)                    | Observation                       | Moderna      | 40                         |
| <b>Post-2nd vaccine dose in Adult Controls</b>   |     |        |                                  |                                              |                              |                                   |              |                            |
| C-1                                              | 24  | Female | Healthy                          | N/A*                                         | N/A                          | N/A                               | Pfizer       | 38                         |
| C-2                                              | 38  | Female | Healthy                          | N/A                                          | N/A                          | N/A                               | Moderna      | 38                         |
| C-3                                              | 31  | Female | Healthy                          | N/A                                          | N/A                          | N/A                               | Pfizer       | 38                         |
| C-4                                              | 34  | Female | Healthy                          | N/A                                          | N/A                          | N/A                               | Pfizer       | 38                         |
| C-5                                              | 35  | Female | Healthy                          | N/A                                          | N/A                          | N/A                               | Pfizer       | 57                         |
| C-6                                              | 47  | Male   | Healthy                          | N/A                                          | N/A                          | N/A                               | Moderna      | 31                         |
| C-7                                              | 24  | Female | Healthy                          | N/A                                          | N/A                          | N/A                               | Pfizer       | 27                         |
| C-8                                              | 71  | Female | Healthy                          | N/A                                          | N/A                          | N/A                               | Moderna      | 58                         |
| C-9                                              | 75  | Male   | Healthy                          | N/A                                          | N/A                          | N/A                               | Moderna      | 58                         |
| C-10                                             | 21  | Female | Healthy                          | N/A                                          | N/A                          | N/A                               | Pfizer       | 29                         |
| C-11                                             | 34  | Male   | Healthy                          | N/A                                          | N/A                          | N/A                               | Pfizer       | 36                         |
| C-12                                             | 70  | Female | Healthy                          | N/A                                          | N/A                          | N/A                               | Moderna      | 29                         |
| C-13                                             | 43  | Male   | Healthy                          | N/A                                          | N/A                          | N/A                               | Moderna      | 41                         |
| C-14                                             | 28  | Female | Healthy                          | N/A                                          | N/A                          | N/A                               | Moderna      | 38                         |
| C-15                                             | 35  | Female | Healthy                          | N/A                                          | N/A                          | N/A                               | Pfizer       | 43                         |
| C-16                                             | 26  | Male   | Healthy                          | N/A                                          | N/A                          | N/A                               | Moderna      | 57                         |
| <b>Post-3rd vaccine dose in Adult Controls</b>   |     |        |                                  |                                              |                              |                                   |              |                            |
| C-1                                              | 24  | Female | Healthy                          | N/A                                          | N/A                          | N/A                               | Pfizer       | 51                         |
| C-2                                              | 38  | Female | Healthy                          | N/A                                          | N/A                          | N/A                               | Pfizer       | 64                         |
| C-3                                              | 31  | Female | Healthy                          | N/A                                          | N/A                          | N/A                               | Pfizer       | 37                         |
| C-4                                              | 34  | Female | Healthy                          | N/A                                          | N/A                          | N/A                               | Pfizer       | 42                         |
| C-6                                              | 47  | Male   | Healthy                          | N/A                                          | N/A                          | N/A                               | Pfizer       | 59                         |
| C-8                                              | 71  | Female | Healthy                          | N/A                                          | N/A                          | N/A                               | Pfizer       | 79                         |
| C-9                                              | 75  | Male   | Healthy                          | N/A                                          | N/A                          | N/A                               | Pfizer       | 83                         |
| C-10                                             | 21  | Female | Healthy                          | N/A                                          | N/A                          | N/A                               | Pfizer       | 56                         |
| C-11                                             | 34  | Male   | Healthy                          | N/A                                          | N/A                          | N/A                               | Pfizer       | 62                         |
| C-12                                             | 70  | Female | Healthy                          | N/A                                          | N/A                          | N/A                               | Pfizer       | 33                         |
| C-13                                             | 43  | Male   | Healthy                          | N/A                                          | N/A                          | N/A                               | Pfizer       | 45                         |
| C-14                                             | 28  | Female | Healthy                          | N/A                                          | N/A                          | N/A                               | Pfizer       | 29                         |
| C-15                                             | 35  | Female | Healthy                          | N/A                                          | N/A                          | N/A                               | Pfizer       | 51                         |
| C-16                                             | 26  | Male   | Healthy                          | N/A                                          | N/A                          | N/A                               | Pfizer       | 39                         |

\* Revised international prognostic scoring system (IPSS-R) as per Greenberg PL, et al. Blood. 2012;120(12):2454-2465.

European LeukemiaNet (ELN) as per Dohner, H., et al. Blood. 2017;129(4):424-447.

Dynamic International Prognostic Scoring System (DIPSS) as per Passamoni, F., et al. Blood. 2010;115(9):1703-1708

\*\* N/A is not applicable

†P-30 and P-30R are samples collected from the identical patient at different time points

a: Patient had documented breakthrough infection 278 days post 2nd vaccination: prolonged hospitalization and viral shedding; fully recovered

b: Patient had documented breakthrough infection 24 days post 2nd vaccination: managed as outpatient; fully recovered

c: Patient had documented breakthrough infection 126 days post 2nd vaccination: prolonged hospitalization and viral shedding; fully recovered

MDS: Myelodysplastic Syndromes

AML: Acute Myeloid Leukemia

AML-MRC: AML with Myelodysplasia-Related Changes

Post ET-MF: Post Essential Thrombocytopenia-Myelofibrosis

PV: Polycythemia Vera

ET: Essential Thrombocytopenia

MF: Myelofibrosis



Supplementary Table S2. Demographics and neutralization titers of post-vaccination serum used in this study

| Donor ID                                         | Diagnosis       | Type of COVID-19 Vaccine | Sex | Age (in years) | 50 % Neutralization titer |               |               |               |               |              |
|--------------------------------------------------|-----------------|--------------------------|-----|----------------|---------------------------|---------------|---------------|---------------|---------------|--------------|
|                                                  |                 |                          |     |                | WA1/2020                  | Alpha         | Beta          | Gamma         | Delta         | Omicron      |
| <b>Post-2nd vaccine dose in AML/MDS patients</b> |                 |                          |     |                |                           |               |               |               |               |              |
| P-1                                              | MDS             | Moderna                  | M   | 81             | 52.8                      | 21.7          | 10.0          | 10.0          | 10.0          | 10.0         |
| P-2                                              | CMMML           | Moderna                  | M   | 45             | 42.0                      | 18.5          | 10.0          | 10.0          | 10.0          | 10.0         |
| P-3                                              | MDS             | Moderna                  | F   | 76             | 66.2                      | 10.0          | 10.0          | 10.0          | 10.0          | 10.0         |
| P-4                                              | AML             | Moderna                  | M   | 77             | 10.0                      | 10.0          | 10.0          | 10.0          | 10.0          | 10.0         |
| P-5                                              | MDS             | Pfizer                   | F   | 65             | 36.9                      | 20.2          | 10.0          | 10.0          | 10.0          | 10.0         |
| P-6                                              | AML-MRC         | Moderna                  | M   | 76             | 10.0                      | 10.0          | 10.0          | 10.0          | 10.0          | 10.0         |
| P-7                                              | MDS             | Moderna                  | F   | 82             | 10.0                      | 10.0          | 10.0          | 10.0          | 10.0          | 10.0         |
| P-8                                              | MDS             | Moderna                  | M   | 76             | 326.2                     | 94.8          | 116.0         | 114.8         | 105.7         | 10.0         |
| P-9                                              | MDS             | Pfizer                   | M   | 52             | 742.5                     | 182.6         | 45.4          | 68.0          | 88.2          | 10.0         |
| P-10                                             | MDS             | Pfizer                   | M   | 73             | 39.6                      | 10.0          | 10.0          | 10.0          | 10.0          | 10.0         |
| P-11                                             | AML-MRC         | Moderna                  | M   | 74             | 2172.2                    | 326.5         | 10.0          | 10.0          | 10.0          | 10.0         |
| P-12                                             | MDS             | Moderna                  | M   | 66             | 10.0                      | 10.0          | 10.0          | 10.0          | 10.0          | 10.0         |
| P-13                                             | AML-MRC         | Janssen                  | M   | 74             | 2477.5                    | 736.8         | 22.3          | 64.3          | 105.1         | 10.0         |
| P-14                                             | MDS             | Pfizer                   | M   | 65             | 72.0                      | 33.0          | 33.0          | 25.0          | 64.0          | 10.0         |
| P-15                                             | Post ET MF      | Pfizer                   | F   | 79             | 10.0                      | 10.0          | 10.0          | 10.0          | 10.0          | 10.0         |
| P-16                                             | PV              | Pfizer                   | M   | 52             | 22.0                      | 10.0          | 10.0          | 10.0          | 10.0          | 10.0         |
| P-17                                             | AML             | Pfizer                   | M   | 63             | 58.0                      | 10.0          | 10.0          | 10.0          | 10.0          | 10.0         |
| P-18                                             | MDS             | Pfizer                   | F   | 73             | 10.0                      | 10.0          | 10.0          | 10.0          | 10.0          | 10.0         |
| P-19                                             | MDS             | Pfizer                   | F   | 82             | 12762.0                   | 4754.0        | 1508.0        | 1893.0        | 648.0         | 648.0        |
| P-20                                             | PV              | Pfizer                   | F   | 39             | 820.0                     | 383.0         | 354.0         | 405.0         | 10.0          | 10.0         |
| P-21                                             | Post ET MF      | Moderna                  | M   | 59             | 2401.0                    | 260.0         | 302.0         | 302.0         | 1558.0        | 62.0         |
| P-22                                             | AML             | Moderna                  | M   | 77             | 472.0                     | 10.0          | 32.0          | 32.0          | 213.0         | 10.0         |
| P-23                                             | AML             | Pfizer                   | M   | 76             | 272.0                     | 79.0          | 174.0         | 174.0         | 137.0         | 10.0         |
| P-24                                             | ET              | Pfizer                   | F   | 56             | 154.0                     | 10.0          | 59.0          | 59.0          | 42.0          | 10.0         |
| P-25                                             | AML             | Pfizer                   | M   | 28             | 167.3                     | 52.7          | 28.9          | 34.7          | 34.9          | 10.0         |
| P-26                                             | MF              | Pfizer                   | F   | 63             | 592.0                     | 344.0         | 10.0          | 76.0          | 219.0         | 10.0         |
| P-27                                             | MDS             | Moderna                  | M   | 70             | 313.0                     | 242.0         | 63.0          | 164.0         | 10.0          | 10.0         |
| P-28                                             | MDS             | Moderna                  | F   | 76             | 322.0                     | 280.0         | 117.0         | 202.0         | 10.0          | 10.0         |
| P-29                                             | PV              | Pfizer                   | F   | 55             | 718.1                     | 293.8         | 317.7         | 183.0         | 183.2         | 50.3         |
| P-30                                             | MDS             | Moderna                  | F   | 70             | 133.0                     | 119.0         | 10.0          | 23.0          | 56.0          | 10.0         |
| P-31                                             | MDS             | Moderna                  | F   | 89             | 566.2                     | 357.2         | 105.6         | 93.5          | 136.3         | 10.0         |
| P-32                                             | MDS             | Moderna                  | F   | 69             | 304.0                     | 127.0         | 10.0          | 73.0          | 10.0          | 10.0         |
| P-33                                             | MF              | Moderna                  | F   | 71             | 63.0                      | 36.0          | 10.0          | 10.0          | 45.0          | 10.0         |
| P-34                                             | PV              | Moderna                  | M   | 81             | 55.0                      | 28.0          | 10.0          | 10.0          | 48.0          | 10.0         |
| P-35                                             | MDS             | Pfizer                   | M   | 64             | 51.0                      | 10.0          | 10.0          | 10.0          | 10.0          | 10.0         |
| P-36                                             | PV              | Moderna                  | F   | 69             | 138.0                     | 59.0          | 10.0          | 40.0          | 10.0          | 10.0         |
| P-37                                             | AML-MRC         | Moderna                  | F   | 83             | 242.0                     | 165.0         | 52.0          | 93.0          | 140.0         | 10.0         |
| P-38                                             | PV              | Moderna                  | M   | 66             | 10.0                      | 10.0          | 10.0          | 10.0          | 10.0          | 10.0         |
| <b>Geometric mean titer</b>                      |                 |                          |     |                | <b>138.7</b>              | <b>64.2</b>   | <b>30.5</b>   | <b>38.8</b>   | <b>39.2</b>   | <b>13.1</b>  |
| <b>Post-3rd vaccine dose in AML/MDS patients</b> |                 |                          |     |                |                           |               |               |               |               |              |
| P-48                                             | AML             | Moderna                  | M   | 78             | 10.0                      | 10.0          | 10.0          | 10.0          | 10.0          | 10.0         |
| P-49                                             | AML             | Moderna                  | M   | 82             | 29.7                      | 10.0          | 10.0          | 10.0          | 10.0          | 10.0         |
| P-50                                             | AML MRC         | Moderna                  | M   | 77             | 350.2                     | 312.9         | 10.0          | 10.0          | 61.1          | 10.0         |
| P-51                                             | MDS             | Moderna                  | M   | 79             | 291.4                     | 273.4         | 24.0          | 59.8          | 55.0          | 10.0         |
| P-52                                             | MDS             | Pfizer                   | M   | 64             | 4109.4                    | 3989.5        | 605.0         | 1142.2        | 1316.8        | 51.5         |
| P-53                                             | MDS             | Pfizer                   | M   | 65             | 304.6                     | 272.5         | 37.3          | 32.2          | 287.6         | 10.0         |
| P-54                                             | MDS             | Moderna                  | F   | 70             | 1510.9                    | 1466.0        | 694.0         | 618.5         | 1099.4        | 29.7         |
| P-55                                             | AML-MRC         | Moderna                  | F   | 74             | 9075.0                    | 7139.7        | 4685.3        | 5056.8        | 4056.1        | 169.4        |
| P-56                                             | MDS             | Moderna                  | F   | 63             | 112.6                     | 37.6          | 10.0          | 10.0          | 10.0          | 10.0         |
| P-57                                             | MDS             | Moderna                  | F   | 76             | 10.0                      | 10.0          | 10.0          | 10.0          | 10.0          | 10.0         |
| P-30R                                            | MDS             | Moderna                  | F   | 70             | 3556.0                    | 3135.0        | 1016.0        | 934.8         | 1683.0        | 256.9        |
| <b>Geometric mean titer</b>                      |                 |                          |     |                | <b>304.5</b>              | <b>233.9</b>  | <b>69.4</b>   | <b>77.9</b>   | <b>122.8</b>  | <b>22.3</b>  |
| <b>Post-2nd vaccine dose in Healthy Adults</b>   |                 |                          |     |                |                           |               |               |               |               |              |
| C-1                                              | Healthy Control | Pfizer                   | F   | 24             | 5848.8                    | 4184.5        | 986.3         | 916.4         | 1277.5        | 230.6        |
| C-2                                              | Healthy Control | Moderna                  | F   | 38             | 542.9                     | 411.8         | 347.0         | 273.1         | 527.0         | 10.0         |
| C-3                                              | Healthy Control | Pfizer                   | F   | 31             | 944.9                     | 616.5         | 219.2         | 278.8         | 828.0         | 21.4         |
| C-4                                              | Healthy Control | Pfizer                   | F   | 34             | 766.8                     | 851.1         | 561.0         | 465.8         | 734.9         | 10.0         |
| C-5                                              | Healthy Control | Pfizer                   | F   | 35             | 3393.3                    | 2429.8        | 962.8         | 1110.0        | 2073.4        | 194.5        |
| C-6                                              | Healthy Control | Moderna                  | M   | 47             | 4746.7                    | 4145.4        | 1120.1        | 998.0         | 1804.0        | 209.3        |
| C-7                                              | Healthy Control | Pfizer                   | F   | 24             | 853.7                     | 796.6         | 318.9         | 376.5         | 840.6         | 34.9         |
| C-8                                              | Healthy Control | Moderna                  | F   | 71             | 5659.7                    | 5199.9        | 3015.4        | 3578.1        | 3520.3        | 212.8        |
| C-9                                              | Healthy Control | Moderna                  | M   | 75             | 1696.1                    | 987.6         | 184.2         | 286.9         | 1328.1        | 10.0         |
| C-10                                             | Healthy Control | Pfizer                   | F   | 21             | 1594.1                    | 1431.8        | 231.8         | 100.3         | 1448.2        | 10.0         |
| C-11                                             | Healthy Control | Pfizer                   | M   | 34             | 822.6                     | 791.0         | 256.187       | 295.9         | 353.1         | 10.0         |
| C-12                                             | Healthy Control | Moderna                  | F   | 70             | 367.8                     | 261.2         | 152.2         | 246.5         | 42.8          | 10.0         |
| C-13                                             | Healthy Control | Moderna                  | M   | 43             | 9543.7                    | 8439.4        | 1134.0        | 953.524       | 6636.1        | 311.5        |
| C-14                                             | Healthy Control | Moderna                  | F   | 28             | 1146.3                    | 814.0         | 507.524       | 635.029       | 794.7         | 75.9         |
| C-15                                             | Healthy Control | Pfizer                   | F   | 35             | 1601.0                    | 1136.9        | 576.815       | 585.7         | 762.5         | 77.2         |
| C-16                                             | Healthy Control | Moderna                  | M   | 26             | 2146.9                    | 1671.2        | 395.3         | 484.4         | 925.4         | 83.5         |
| <b>Geometric mean titer</b>                      |                 |                          |     |                | <b>1713.0</b>             | <b>1364.0</b> | <b>485.5</b>  | <b>504.2</b>  | <b>956.5</b>  | <b>44.4</b>  |
| <b>Post-3rd vaccine dose in Healthy Adults</b>   |                 |                          |     |                |                           |               |               |               |               |              |
| C-1                                              | Healthy Control | Pfizer                   | F   | 24             | 4176.1                    | 2253.9        | 1223.8        | 937.1         | 2536.1        | 350.5        |
| C-2                                              | Healthy Control | Pfizer                   | F   | 38             | 1989.1                    | 716.0         | 488.5         | 501.7         | 1533.3        | 491.0        |
| C-3                                              | Healthy Control | Pfizer                   | F   | 31             | 1533.6                    | 1336.9        | 659.3         | 792.9         | 1142.1        | 536.6        |
| C-4                                              | Healthy Control | Pfizer                   | F   | 34             | 1616.1                    | 1365.9        | 824.0         | 887.6         | 1261.4        | 138.9        |
| C-6                                              | Healthy Control | Pfizer                   | M   | 47             | 3782.5                    | 2239.6        | 1119.5        | 1325.6        | 2261.4        | 305.6        |
| C-8                                              | Healthy Control | Pfizer                   | F   | 71             | 2802.1                    | 1422.5        | 752.6         | 1014.2        | 1193.1        | 485.5        |
| C-9                                              | Healthy Control | Pfizer                   | M   | 75             | 1108.5                    | 1189.8        | 570.0         | 705.5         | 804.7         | 71.7         |
| C-10                                             | Healthy Control | Pfizer                   | F   | 21             | 3745.0                    | 3482.5        | 1747.1        | 2216.6        | 2971.9        | 246.2        |
| C-11                                             | Healthy Control | Pfizer                   | M   | 34             | 822.6                     | 791.0         | 256.187       | 295.9         | 353.1         | 106.3        |
| C-13                                             | Healthy Control | Pfizer                   | M   | 43             | 12771.9                   | 10199.5       | 4363.9        | 3978.0        | 7150.5        | 987.6        |
| C-14                                             | Healthy Control | Pfizer                   | F   | 28             | 5040.3                    | 3537.2        | 985.2         | 1408.9        | 2221.0        | 293.4        |
| C-15                                             | Healthy Control | Pfizer                   | F   | 35             | 6579.0                    | 3663.0        | 1170.0        | 1586.4        | 3468.9        | 646.5        |
| C-16                                             | Healthy Control | Pfizer                   | M   | 26             | 9171.3                    | 7333.3        | 2877.2        | 3575.8        | 6705.8        | 942.5        |
| <b>Geometric mean titer</b>                      |                 |                          |     |                | <b>3141.0</b>             | <b>2209.0</b> | <b>1001.0</b> | <b>1155.0</b> | <b>1917.0</b> | <b>334.0</b> |

# Supplementary Figure S1

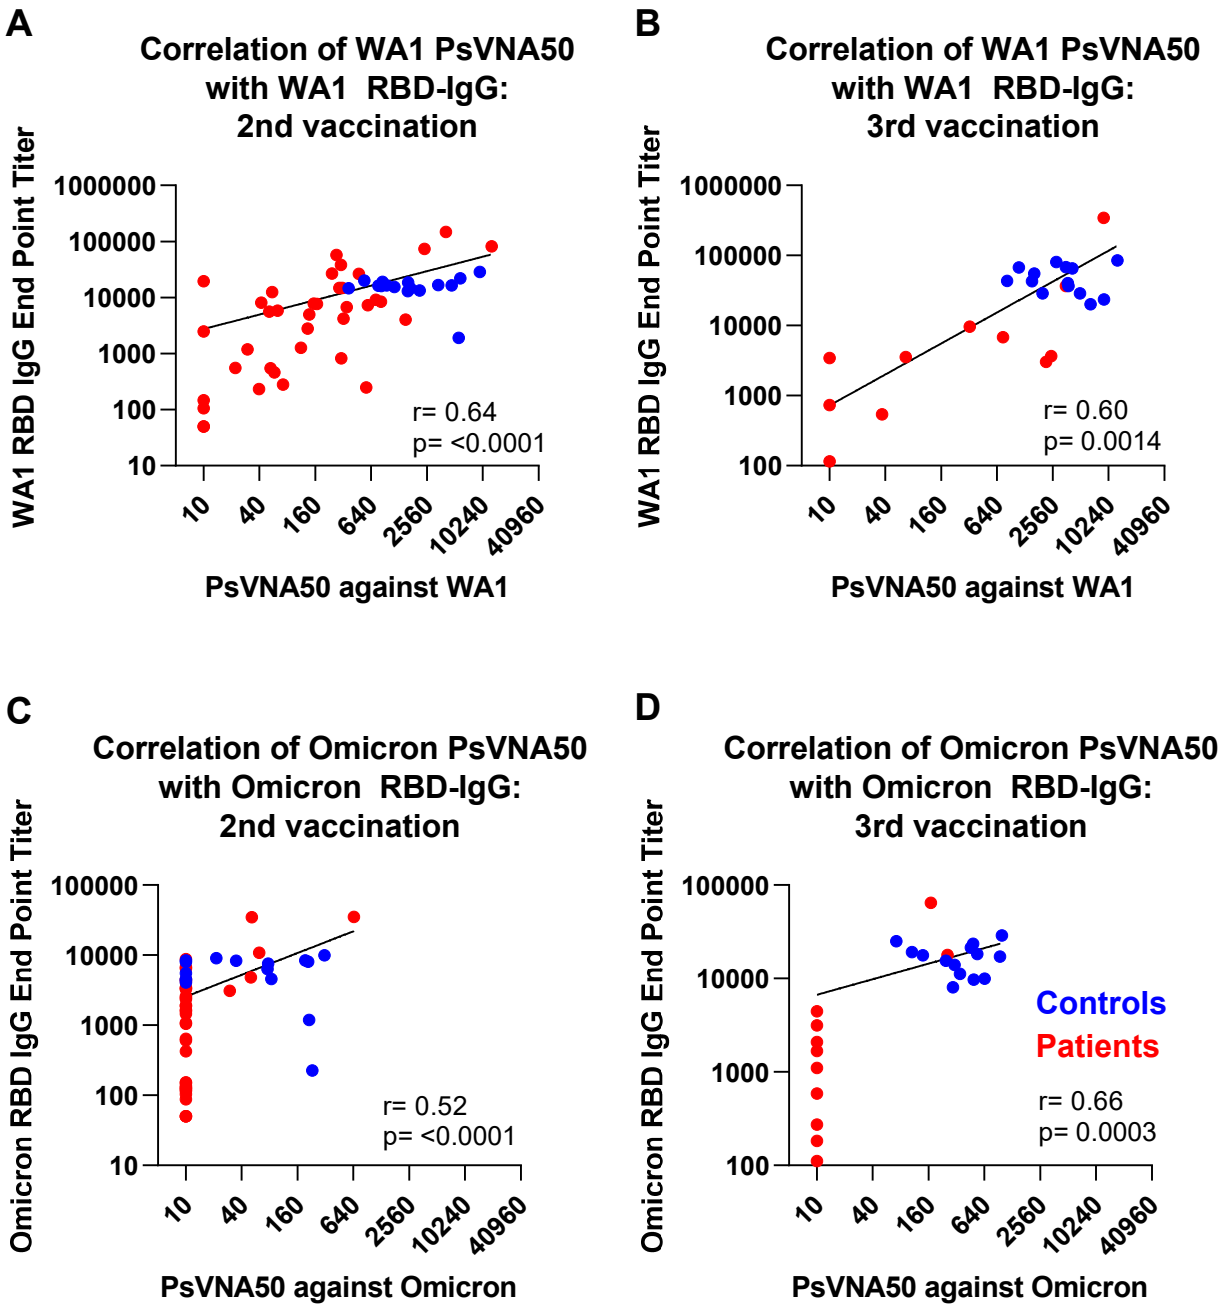

**Supplementary Figure S1: Relationship of post-vaccination SARS-CoV-2 serum neutralizing antibodies in AML/MDS patients and healthy controls with SARS-CoV-2 RBD binding antibodies.** Correlation analysis between serum PsVNA50 neutralization antibody titers generated following second (panels A & C) and third (panels B & D) vaccination of 48 AML/MDS patients (in red) or 16 healthy controls (in blue) against vaccine-matched SARS-CoV-2 WA1 or the Omicron variant, and binding antibodies against either SARS-CoV-2 WA1 RBD (panels A-B) or Omicron RBD (panels C-D). Correlation analysis was performed using non-linear regression model and associated Spearman's correlation coefficients ( $r$ ) and regression significance ( $p$ ) are shown.
